# Supplementary material for: Rates and Determinants of Use of Pharmacotherapy and Psychotherapy by Patients With Major Depressive Disorder
Source: Atypon-hosted journal article supplement (doi:10.1176/appi.ps.201800275), 2019-01-11
Supplement: appi.ps.201800275.ds001.pdf [file appi.ps.201800275.ds001.pdf]

**Supplemental Material for**  
**Rates and Determinants of Pharmacological and Psychotherapy Utilization for Patients with Major Depressive Disorder**

**Flow diagram of inclusion/exclusion steps for generating our study populations**

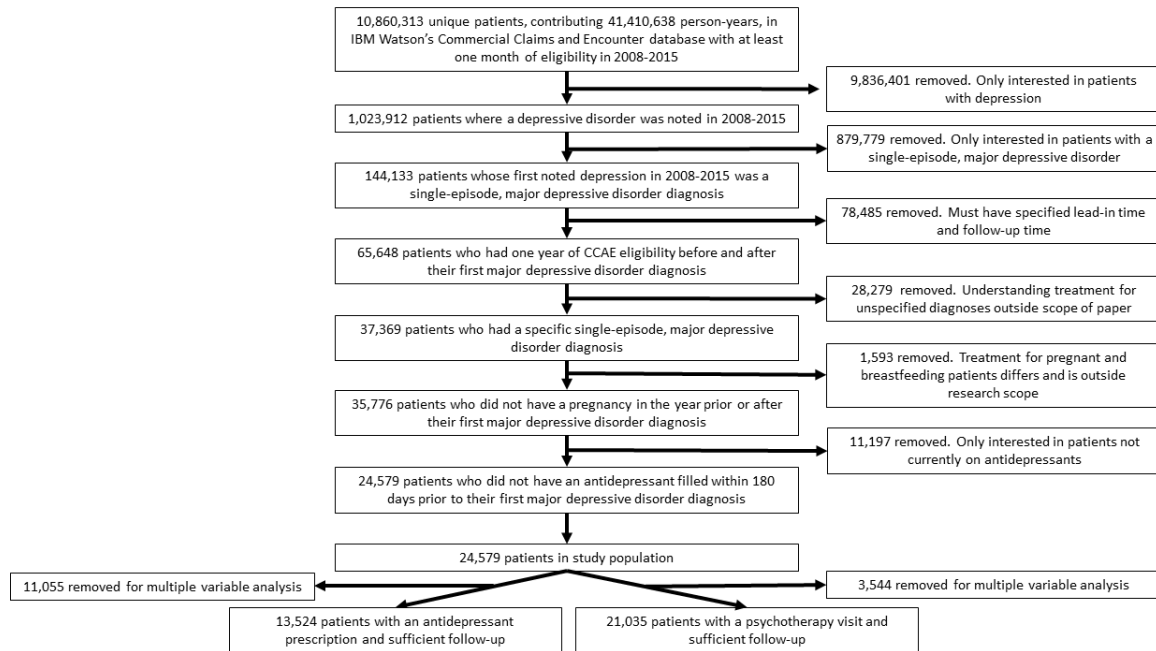

**Medical codes used in generating the study population**

| Medical code used to find first depression diagnosis | Medical code description                                                                 | Allowed first MDD diagnosis in study population | Diagnosis grouping |
|------------------------------------------------------|------------------------------------------------------------------------------------------|-------------------------------------------------|--------------------|
| 296.20                                               | Major Depressive Disorder, Single Episode; Unspecified                                   | FALSE <sup>1</sup>                              | See caption 1      |
| 296.21                                               | Major Depressive Disorder, Single Episode; Mild                                          | TRUE                                            | Mild               |
| 296.22                                               | Major Depressive Disorder, Single Episode; Moderate                                      | TRUE                                            | Moderate           |
| 296.23                                               | Major Depressive Disorder, Single Episode; Severe, without Mention of Psychotic Behavior | TRUE                                            | Severe             |
| 296.24                                               | Major Depressive Disorder, Single Episode; Severe, Specified as with Psychotic Behavior  | TRUE                                            | Severe             |
| 296.25                                               | Major Depressive Disorder, Single Episode; in Partial or Unspecified Remission           | TRUE                                            | Remission          |
| 296.26                                               | Major Depressive Disorder, Single Episode; in Full Remission                             | TRUE                                            | Remission          |
| 296.30                                               | Major Depressive Disorder, Recurrent Episode; Unspecified                                | FALSE                                           | -                  |
| 296.31                                               | Major Depressive Disorder, Recurrent Episode; Mild                                       | FALSE                                           | -                  |

| <b>Medical code used to find first depression diagnosis</b> | <b>Medical code description</b>                                                                                                      | <b>Allowed first MDD diagnosis in study population</b> | <b>Diagnosis grouping</b> |
|-------------------------------------------------------------|--------------------------------------------------------------------------------------------------------------------------------------|--------------------------------------------------------|---------------------------|
| 296.32                                                      | Major Depressive Disorder, Recurrent Episode; Moderate                                                                               | FALSE                                                  | -                         |
| 296.33                                                      | Major Depressive Disorder, Recurrent Episode; Severe, without Mention of Psychotic Behavior                                          | FALSE                                                  | -                         |
| 296.34                                                      | Major Depressive Disorder, Recurrent Episode; Severe, Specified as with Psychotic Behavior                                           | FALSE                                                  | -                         |
| 296.35                                                      | Major Depressive Disorder, Recurrent Episode; in Partial or Unspecified Remission                                                    | FALSE                                                  | -                         |
| 296.36                                                      | Major Depressive Disorder, Recurrent Episode; in Full Remission                                                                      | FALSE                                                  | -                         |
| 293.83                                                      | Mood Disorder in Conditions Classified Elsewhere; Transient Organic Psychotic Condition, Depressive Type                             | FALSE                                                  | -                         |
| 300.4                                                       | Dysthymic Disorder; Anxiety Depression, Depression with Anxiety, Depressive Reaction, Neurotic Depressive State, Reactive Depression | FALSE                                                  | -                         |
| 311                                                         | Depressive Disorder, Not Elsewhere Classified                                                                                        | FALSE                                                  | -                         |
| F06.30                                                      | Mood disorder due to known physiological condition, unspecified                                                                      | FALSE                                                  | -                         |
| F06.31                                                      | Mood disorder due to known physiological condition with depressive features                                                          | FALSE                                                  | -                         |
| F06.32                                                      | Mood disorder due to known physiological condition with major depressive-like episode                                                | FALSE                                                  | -                         |
| F06.33                                                      | Mood disorder due to known physiological condition with manic features                                                               | FALSE                                                  | -                         |
| F06.34                                                      | Mood disorder due to known physiological condition with mixed features                                                               | FALSE                                                  | -                         |
| F32.0                                                       | Major depressive disorder, single episode, mild                                                                                      | TRUE                                                   | Mild                      |
| F32.1                                                       | Major depressive disorder, single episode, moderate                                                                                  | TRUE                                                   | Moderate                  |
| F32.2                                                       | Major depressive disorder, single episode, severe without psychotic features                                                         | TRUE                                                   | Severe                    |
| F32.3                                                       | Major depressive disorder, single episode, severe with psychotic features                                                            | TRUE                                                   | Severe                    |
| F32.4                                                       | Major depressive disorder, single episode, in partial remission                                                                      | TRUE                                                   | Remission                 |
| F32.5                                                       | Major depressive disorder, single episode, in full remission                                                                         | TRUE                                                   | Remission                 |
| F32.9                                                       | Major depressive disorder, single episode, unspecified                                                                               | FALSE <sup>1</sup>                                     | See caption 1             |
| F33.0                                                       | Major depressive disorder, recurrent, mild                                                                                           | FALSE                                                  | -                         |
| F33.1                                                       | Major depressive disorder, recurrent, moderate                                                                                       | FALSE                                                  | -                         |
| F33.2                                                       | Major depressive disorder, recurrent severe without psychotic features                                                               | FALSE                                                  | -                         |

| <b>Medical code used to find first depression diagnosis</b> | <b>Medical code description</b>                                 | <b>Allowed first MDD diagnosis in study population</b> | <b>Diagnosis grouping</b> |
|-------------------------------------------------------------|-----------------------------------------------------------------|--------------------------------------------------------|---------------------------|
| F33.40                                                      | Major depressive disorder, recurrent, in remission, unspecified | FALSE                                                  | -                         |
| F33.41                                                      | Major depressive disorder, recurrent, in partial remission      | FALSE                                                  | -                         |
| F33.42                                                      | Major depressive disorder, recurrent, in full remission         | FALSE                                                  | -                         |
| F33.9                                                       | Major depressive disorder, recurrent, unspecified               | FALSE                                                  | -                         |
| F34.1                                                       | Dysthymic disorder                                              | FALSE                                                  | -                         |

<sup>1</sup> Patients included if the first MDD diagnosis was unspecified, but the most common MDD diagnosis in the year after their initial diagnosis was in another allowed MDD diagnosis categories.

Potential variables that were evaluated as predictors for antidepressant adherence in the multiple variable regression models, along with their corresponding distributions (n = 13,524)

| Variable description                                                                                                                        | Variable type | Distribution                    |
|---------------------------------------------------------------------------------------------------------------------------------------------|---------------|---------------------------------|
| Age at first depression diagnosis                                                                                                           | Numeric       | Median = 41, IQR = 33 - 49      |
| Antidepressant classes were switched at least once during the continuation phase                                                            | Binomial      | No = 61.3%, Yes = 38.7%         |
| Antidepressant cost share in the continuation phase                                                                                         | Numeric       | Median = 0.41, IQR = 0.2 - 0.98 |
| Antidepressant dosage within American Psychiatric Association's recommendations for at least one prescription during the continuation phase | Binomial      | No = 21.2%, Yes = 78.8%         |
| Antidepressant PDC is above or equal to 0.8 during the continuation phase                                                                   | Binomial      | No = 68%, Yes = 32%             |
| Antidepressant were mail ordered. At least one prescription during the continuation phase                                                   | Binomial      | No = 88.3%, Yes = 11.7%         |
| Comorbidity of alcohol abuse in the year prior to first depression diagnosis                                                                | Binomial      | No = 98.8%, Yes = 1.2%          |
| Comorbidity of an adjustment disorder in year prior to first depression diagnosis                                                           | Binomial      | No = 88.6%, Yes = 11.4%         |
| Comorbidity of anemia in the year prior to first depression diagnosis                                                                       | Binomial      | No = 97.8%, Yes = 2.2%          |
| Comorbidity of anxiety disorder in the year prior to first depression diagnosis                                                             | Binomial      | No = 86.1%, Yes = 13.9%         |
| Comorbidity of arrhythmia in the year prior to first depression diagnosis                                                                   | Binomial      | No = 96.7%, Yes = 3.3%          |
| Comorbidity of attention deficit disorder and attention deficit hyperactivity disorder in the year prior to first depression diagnosis      | Binomial      | No = 98.2%, Yes = 1.8%          |
| Comorbidity of bipolar disorder in the year prior to first depression diagnosis                                                             | Binomial      | No = 98.4%, Yes = 1.6%          |
| Comorbidity of complicated diabetes mellitus in the year prior to first depression diagnosis                                                | Binomial      | No = 98.7%, Yes = 1.3%          |
| Comorbidity of complicated hypertension in the year prior to first depression diagnosis                                                     | Binomial      | No = 98.9%, Yes = 1.1%          |
| Comorbidity of fluid and electrolyte disorder in the year prior to first depression diagnosis                                               | Binomial      | No = 98.2%, Yes = 1.8%          |
| Comorbidity of hypothyroidism in the year prior to first depression diagnosis                                                               | Binomial      | No = 93.3%, Yes = 6.7%          |
| Comorbidity of liver disease in the year prior to first depression diagnosis                                                                | Binomial      | No = 97.6%, Yes = 2.4%          |
| Comorbidity of obesity in the year prior to first depression diagnosis                                                                      | Binomial      | No = 94.6%, Yes = 5.4%          |
| Comorbidity of other neurological disorders in the year prior to first depression diagnosis                                                 | Binomial      | No = 98.6%, Yes = 1.4%          |

| <b>Variable description</b>                                                                                                    | <b>Variable type</b> | <b>Distribution</b>     |
|--------------------------------------------------------------------------------------------------------------------------------|----------------------|-------------------------|
| <b>Comorbidity of pulmonary disease in the year prior to first depression diagnosis</b>                                        | Binomial             | No = 92.2%, Yes = 7.8%  |
| <b>Comorbidity of pulmonary vascular disorders in the year prior to first depression diagnosis</b>                             | Binomial             | No = 99%, Yes = 1%      |
| <b>Comorbidity of rheumatoid arthritis/ collagen vascular disease in the year prior to first depression diagnosis</b>          | Binomial             | No = 97.8%, Yes = 2.2%  |
| <b>Comorbidity of solid tumor with metastasis diagnosis in the year prior to first depression diagnosis</b>                    | Binomial             | No = 98%, Yes = 2%      |
| <b>Comorbidity of substance abuse in the year prior to first depression diagnosis</b>                                          | Binomial             | No = 96.9%, Yes = 3.1%  |
| <b>Comorbidity of substance related disorders in the year prior to first depression diagnosis</b>                              | Binomial             | No = 98.9%, Yes = 1.1%  |
| <b>Comorbidity of uncomplicated diabetes mellitus in the year prior to first depression diagnosis</b>                          | Binomial             | No = 92.8%, Yes = 7.2%  |
| <b>Comorbidity of uncomplicated hypertension in the year prior to first depression diagnosis</b>                               | Binomial             | No = 81.9%, Yes = 18.1% |
| <b>Comorbidity of valvular disease in the year prior to first depression diagnosis</b>                                         | Binomial             | No = 98.2%, Yes = 1.8%  |
| <b>Comorbidity of weight loss in the year prior to first depression diagnosis</b>                                              | Binomial             | No = 98.8%, Yes = 1.2%  |
| <b>First antidepressant prescription was for a norepinephrine dopamine reuptake inhibitor</b>                                  | Binomial             | No = 88.3%, Yes = 11.7% |
| <b>First antidepressant prescription was for a norepinephrine serotonin modulator</b>                                          | Binomial             | No = 98%, Yes = 2%      |
| <b>First antidepressant prescription was for a selective serotonin reuptake inhibitor</b>                                      | Binomial             | No = 38.1%, Yes = 61.9% |
| <b>First antidepressant prescription was for a selective serotonin reuptake inhibitor and serotonin modulator (concurrent)</b> | Binomial             | No = 95.7%, Yes = 4.3%  |
| <b>First antidepressant prescription was for a serotonin modulator</b>                                                         | Binomial             | No = 95.3%, Yes = 4.7%  |
| <b>First antidepressant prescription was for a serotonin norepinephrine reuptake inhibitor</b>                                 | Binomial             | No = 91.1%, Yes = 8.9%  |
| <b>First antidepressant prescription was for a tricyclic</b>                                                                   | Binomial             | No = 97.3%, Yes = 2.7%  |
| <b>Initial diagnosis by a psychiatrist</b>                                                                                     | Binomial             | No = 75.9%, Yes = 24.1% |
| <b>Initial diagnosis by a psychologist</b>                                                                                     | Binomial             | No = 87%, Yes = 13%     |
| <b>Initial diagnosis by a supportive therapist</b>                                                                             | Binomial             | No = 77.6%, Yes = 22.4% |
| <b>Initial diagnosis in a medical doctor (not elsewhere classified) setting</b>                                                | Binomial             | No = 97.9%, Yes = 2.1%  |
| <b>Initial diagnosis in a mental health facility setting</b>                                                                   | Binomial             | No = 97.6%, Yes = 2.4%  |
| <b>Initial diagnosis in a multi-specialty physician group setting</b>                                                          | Binomial             | No = 98.1%, Yes = 1.9%  |

| <b>Variable description</b>                                                                                    | <b>Variable type</b> | <b>Distribution</b>             |
|----------------------------------------------------------------------------------------------------------------|----------------------|---------------------------------|
| <b>Initial diagnosis in an inpatient setting</b>                                                               | Binomial             | No = 90.9%, Yes = 9.1%          |
| <b>Initial diagnosis in another medical facility (not elsewhere classified) setting</b>                        | Binomial             | No = 98.8%, Yes = 1.2%          |
| <b>Initial diagnosis in the acute care hospital setting</b>                                                    | Binomial             | No = 96.7%, Yes = 3.3%          |
| <b>Initial diagnosis in the family practice setting</b>                                                        | Binomial             | No = 82.9%, Yes = 17.1%         |
| <b>Initial diagnosis in the internal medicine setting</b>                                                      | Binomial             | No = 94.6%, Yes = 5.4%          |
| <b>Mental health services covered by health plan</b>                                                           | Binomial             | No = 6.1%, Yes = 93.9%          |
| <b>Number of depression diagnoses during the continuation phase</b>                                            | Numeric              | Median = 4, IQR = 2 - 10        |
| <b>Number of previous years patient was in the MarketScan databases prior to first depression diagnosis</b>    | Numeric              | Median = 2.7, IQR = 1.68 - 4.31 |
| <b>Number of primary diagnoses that were depression diagnoses during the continuation phase</b>                | Numeric              | Median = 4, IQR = 1 - 10        |
| <b>Number of psychiatric visits during the continuation phase</b>                                              | Numeric              | Median = 6, IQR = 2 - 13        |
| <b>Patient's initial depression diagnosis classified as in remission</b>                                       | Binomial             | No = 98.4%, Yes = 1.6%          |
| <b>Patient's initial depression diagnosis classified as mild</b>                                               | Binomial             | No = 81.9%, Yes = 18.1%         |
| <b>Patient's initial depression diagnosis classified as severe</b>                                             | Binomial             | No = 68.7%, Yes = 31.3%         |
| <b>Patient's sex</b>                                                                                           | Binomial             | No = 55.9%, Yes = 44.1%         |
| <b>Patient covered by a comprehensive health plan at time of first depression diagnosis</b>                    | Binomial             | No = 97.5%, Yes = 2.5%          |
| <b>Patient covered by a consumer directed health plan at time of first depression diagnosis</b>                | Binomial             | No = 92.7%, Yes = 7.3%          |
| <b>Patient covered by an exclusive provider organization health plan at time of first depression diagnosis</b> | Binomial             | No = 98.7%, Yes = 1.3%          |
| <b>Patient covered by a health maintenance organization health plan at time of first depression diagnosis</b>  | Binomial             | No = 84.5%, Yes = 15.5%         |
| <b>Patient covered by a high deductible health plan at time of first depression diagnosis</b>                  | Binomial             | No = 96.5%, Yes = 3.5%          |
| <b>Patient covered by a point of service health plan at time of first depression diagnosis</b>                 | Binomial             | No = 87.4%, Yes = 12.6%         |
| <b>Patient covered by a preferred provider organization health plan at time of first depression diagnosis</b>  | Binomial             | No = 42.7%, Yes = 57.3%         |
| <b>Patient in a union at first depression diagnosis</b>                                                        | Binomial             | No = 71.8%, Yes = 28.2%         |
| <b>Patient lived in a rural location at first depression diagnosis</b>                                         | Binomial             | No = 91.9%, Yes = 8.1%          |
| <b>Patient salaried at first depression diagnosis</b>                                                          | Binomial             | No = 54.7%, Yes = 45.3%         |

| <b>Variable description</b>                                                                                               | <b>Variable type</b> | <b>Distribution</b>                                                   |
|---------------------------------------------------------------------------------------------------------------------------|----------------------|-----------------------------------------------------------------------|
| <b>Patient worked in the durable good manufacturing industry at time of first depression diagnosis</b>                    | Binomial             | No = 79.6%, Yes = 20.4%                                               |
| <b>Patient worked in the finance, insurance, and real estate industry at time of first depression diagnosis</b>           | Binomial             | No = 77.2%, Yes = 22.8%                                               |
| <b>Patient worked in the non-durable goods manufacturing industry at time of first depression diagnosis</b>               | Binomial             | No = 91.3%, Yes = 8.7%                                                |
| <b>Patient worked in the retail and trade industry at time of first depression diagnosis</b>                              | Binomial             | No = 95.2%, Yes = 4.8%                                                |
| <b>Patient worked in the services industry at time of first depression diagnosis</b>                                      | Binomial             | No = 83.6%, Yes = 16.4%                                               |
| <b>Patient worked in the transportation, communications, and utilities industry at time of first depression diagnosis</b> | Binomial             | No = 74.5%, Yes = 25.5%                                               |
| <b>Single antidepressant class prescribed during the continuation phase</b>                                               | Binomial             | No = 25.2%, Yes = 74.8%                                               |
| <b>Time to first antidepressant prescription fill from first depression diagnosis</b>                                     | Factor               | Within 30 days = 60.9%,<br>Within a year = 24.3%, Over a year = 14.8% |
| <b>Year of first depression diagnosis</b>                                                                                 | Numeric              | Median = 2011, IQR = 2010 - 2013                                      |

Potential variables that were evaluated as predictors for psychotherapy utilization in the multiple variable regression models and along with their corresponding distributions (n = 21,035)

| <b>Variable description</b>                                                                                                                   | <b>Variable type</b> | <b>Distribution</b>        |
|-----------------------------------------------------------------------------------------------------------------------------------------------|----------------------|----------------------------|
| <b>Age at first depression diagnosis</b>                                                                                                      | Numeric              | Median = 40, IQR = 32 - 49 |
| <b>Antidepressant PDC is above or equal to 0.8 in the first 28 days following first psychotherapy visit</b>                                   | Binomial             | No = 81.8%, Yes = 18.2%    |
| <b>Comorbidity of alcohol abuse in the year prior to first depression diagnosis</b>                                                           | Binomial             | No = 98.9%, Yes = 1.1%     |
| <b>Comorbidity of an adjustment disorder in year prior to first depression diagnosis</b>                                                      | Binomial             | No = 87%, Yes = 13%        |
| <b>Comorbidity of anemia in the year prior to first depression diagnosis</b>                                                                  | Binomial             | No = 98.1%, Yes = 1.9%     |
| <b>Comorbidity of anxiety disorder in the year prior to first depression diagnosis</b>                                                        | Binomial             | No = 86.7%, Yes = 13.3%    |
| <b>Comorbidity of arrhythmia in the year prior to first depression diagnosis</b>                                                              | Binomial             | No = 97.1%, Yes = 2.9%     |
| <b>Comorbidity of attention deficit disorder and attention deficit hyperactivity disorder in the year prior to first depression diagnosis</b> | Binomial             | No = 98.2%, Yes = 1.8%     |
| <b>Comorbidity of bipolar disorder in the year prior to first depression diagnosis</b>                                                        | Binomial             | No = 98.3%, Yes = 1.7%     |
| <b>Comorbidity of complicated diabetes mellitus in the year prior to first depression diagnosis</b>                                           | Binomial             | No = 98.9%, Yes = 1.1%     |
| <b>Comorbidity of complicated hypertension in the year prior to first depression diagnosis</b>                                                | Binomial             | No = 99%, Yes = 1%         |
| <b>Comorbidity of fluid and electrolyte disorder in the year prior to first depression diagnosis</b>                                          | Binomial             | No = 98.4%, Yes = 1.6%     |
| <b>Comorbidity of hypothyroidism in the year prior to first depression diagnosis</b>                                                          | Binomial             | No = 94%, Yes = 6%         |
| <b>Comorbidity of liver disease in the year prior to first depression diagnosis</b>                                                           | Binomial             | No = 97.9%, Yes = 2.1%     |
| <b>Comorbidity of obesity in the year prior to first depression diagnosis</b>                                                                 | Binomial             | No = 94.8%, Yes = 5.2%     |
| <b>Comorbidity of other neurological disorders in the year prior to first depression diagnosis</b>                                            | Binomial             | No = 98.7%, Yes = 1.3%     |
| <b>Comorbidity of pulmonary disease in the year prior to first depression diagnosis</b>                                                       | Binomial             | No = 93%, Yes = 7%         |
| <b>Comorbidity of rheumatoid arthritis/ collagen vascular disease in the year prior to first depression diagnosis</b>                         | Binomial             | No = 98%, Yes = 2%         |
| <b>Comorbidity of solid tumor with metastasis diagnosis in the year prior to first depression diagnosis</b>                                   | Binomial             | No = 98.1%, Yes = 1.9%     |



| <b>Variable description</b>                                                                                    | <b>Variable type</b> | <b>Distribution</b>              |
|----------------------------------------------------------------------------------------------------------------|----------------------|----------------------------------|
| <b>Comorbidity of substance abuse in the year prior to first depression diagnosis</b>                          | Binomial             | No = 97.5%, Yes = 2.5%           |
| <b>Comorbidity of uncomplicated diabetes mellitus in the year prior to first depression diagnosis</b>          | Binomial             | No = 93.7%, Yes = 6.3%           |
| <b>Comorbidity of uncomplicated hypertension in the year prior to first depression diagnosis</b>               | Binomial             | No = 83.8%, Yes = 16.2%          |
| <b>Comorbidity of valvular disease in the year prior to first depression diagnosis</b>                         | Binomial             | No = 98.4%, Yes = 1.6%           |
| <b>Comorbidity of weight loss in the year prior to first depression diagnosis</b>                              | Binomial             | No = 99%, Yes = 1%               |
| <b>Initial diagnosis by a psychiatrist</b>                                                                     | Binomial             | No = 79.2%, Yes = 20.8%          |
| <b>Initial diagnosis by a psychologist</b>                                                                     | Binomial             | No = 78.1%, Yes = 21.9%          |
| <b>Initial diagnosis by a supportive therapist</b>                                                             | Binomial             | No = 63.2%, Yes = 36.8%          |
| <b>Initial diagnosis in a medical doctor (not elsewhere classified) setting</b>                                | Binomial             | No = 98.5%, Yes = 1.5%           |
| <b>Initial diagnosis in a mental health facility setting</b>                                                   | Binomial             | No = 97.4%, Yes = 2.6%           |
| <b>Initial diagnosis in an inpatient setting</b>                                                               | Binomial             | No = 94.1%, Yes = 5.9%           |
| <b>Initial diagnosis in another medical facility (not elsewhere classified) setting</b>                        | Binomial             | No = 98.7%, Yes = 1.3%           |
| <b>Initial diagnosis in the acute care hospital setting</b>                                                    | Binomial             | No = 97.8%, Yes = 2.2%           |
| <b>Initial diagnosis in the family practice setting</b>                                                        | Binomial             | No = 94.6%, Yes = 5.4%           |
| <b>Initial diagnosis in the internal medicine setting</b>                                                      | Binomial             | No = 98.2%, Yes = 1.8%           |
| <b>Mental health services covered by health plan</b>                                                           | Binomial             | No = 6.7%, Yes = 93.3%           |
| <b>Number of previous years patient was in the MarketScan databases prior to first depression diagnosis</b>    | Numeric              | Median = 2.73, IQR = 1.69 - 4.32 |
| <b>Patient's initial depression diagnosis classified as in remission</b>                                       | Binomial             | No = 98.7%, Yes = 1.3%           |
| <b>Patient's initial depression diagnosis classified as mild</b>                                               | Binomial             | No = 80%, Yes = 20%              |
| <b>Patient's initial depression diagnosis classified as severe</b>                                             | Binomial             | No = 69.4%, Yes = 30.6%          |
| <b>Patient's sex</b>                                                                                           | Binomial             | No = 52.4%, Yes = 47.6%          |
| <b>Patient covered by a comprehensive health plan at time of first depression diagnosis</b>                    | Binomial             | No = 97.4%, Yes = 2.6%           |
| <b>Patient covered by a consumer directed health plan at time of first depression diagnosis</b>                | Binomial             | No = 92.1%, Yes = 7.9%           |
| <b>Patient covered by an exclusive provider organization health plan at time of first depression diagnosis</b> | Binomial             | No = 98.8%, Yes = 1.2%           |

| <b>Variable description</b>                                                                                               | <b>Variable type</b> | <b>Distribution</b>                                                 |
|---------------------------------------------------------------------------------------------------------------------------|----------------------|---------------------------------------------------------------------|
| <b>Patient covered by a health maintenance organization health plan at time of first depression diagnosis</b>             | Binomial             | No = 84.8%, Yes = 15.2%                                             |
| <b>Patient covered by a high deductible health plan at time of first depression diagnosis</b>                             | Binomial             | No = 96.7%, Yes = 3.3%                                              |
| <b>Patient covered by a point of service health plan at time of first depression diagnosis</b>                            | Binomial             | No = 87.2%, Yes = 12.8%                                             |
| <b>Patient covered by a preferred provider organization health plan at time of first depression diagnosis</b>             | Binomial             | No = 43.1%, Yes = 56.9%                                             |
| <b>Patient filled an antidepressant prior to first psychotherapy visit</b>                                                | Binomial             | No = 47.1%, Yes = 52.9%                                             |
| <b>Patient in a union at first depression diagnosis</b>                                                                   | Binomial             | No = 72.3%, Yes = 27.7%                                             |
| <b>Patient lived in a rural location at first depression diagnosis</b>                                                    | Binomial             | No = 92.2%, Yes = 7.8%                                              |
| <b>Patient received at least four psychotherapy visits in the first 28 days following first psychotherapy visit</b>       | Binomial             | No = 68.8%, Yes = 31.2%                                             |
| <b>Patient salaried at first depression diagnosis</b>                                                                     | Binomial             | No = 50.3%, Yes = 49.7%                                             |
| <b>Patient worked in the durable good manufacturing industry at time of first depression diagnosis</b>                    | Binomial             | No = 79%, Yes = 21%                                                 |
| <b>Patient worked in the finance, insurance, and real estate industry at time of first depression diagnosis</b>           | Binomial             | No = 76.2%, Yes = 23.8%                                             |
| <b>Patient worked in the non-durable goods manufacturing industry at time of first depression diagnosis</b>               | Binomial             | No = 91.1%, Yes = 8.9%                                              |
| <b>Patient worked in the retail and trade industry at time of first depression diagnosis</b>                              | Binomial             | No = 96.3%, Yes = 3.7%                                              |
| <b>Patient worked in the services industry at time of first depression diagnosis</b>                                      | Binomial             | No = 84.2%, Yes = 15.8%                                             |
| <b>Patient worked in the transportation, communications, and utilities industry at time of first depression diagnosis</b> | Binomial             | No = 74.4%, Yes = 25.6%                                             |
| <b>Percent of psychotherapy costs covered by patient</b>                                                                  | Numeric              | Median = 0.2, IQR = 0.1 - 0.36                                      |
| <b>Time to first psychotherapy visit from first depression diagnosis</b>                                                  | Factor               | Within 30 days = 93.4%,<br>Within a year = 4.2%, Over a year = 2.4% |
| <b>Year of first depression diagnosis</b>                                                                                 | Numeric              | Median = 2011, IQR = 2010 - 2013                                    |

Provider types of clinicians diagnosing the initial depression and the distribution of depression severity.

| Provider type <sup>1</sup>             | Diagnosed with any depression (%) | Diagnosed as depression in remission (%) | Diagnosed as mild depression (%) | Diagnosed as moderate depression (%) | Diagnosed as severe depression (%) |
|----------------------------------------|-----------------------------------|------------------------------------------|----------------------------------|--------------------------------------|------------------------------------|
| <b>Therapists (Supportive)</b>         | 31.0                              | 12.0                                     | 34.2                             | 31.6                                 | 28.7                               |
| <b>Psychologist</b>                    | 18.4                              | 8.8                                      | 20.7                             | 18.5                                 | 17.3                               |
| <b>Psychiatry</b>                      | 18.1                              | 21.2                                     | 7.9                              | 18.0                                 | 25.8                               |
| <b>Family Practice</b>                 | 11.6                              | 20.4                                     | 16.2                             | 12.4                                 | 6.3                                |
| <b>Other<sup>2</sup></b>               | 5.8                               | 8.5                                      | 6.3                              | 5.5                                  | 5.5                                |
| <b>Internal Medicine (NEC)</b>         | 3.9                               | 7.7                                      | 5.7                              | 4.1                                  | 1.9                                |
| <b>Acute Care Hospital</b>             | 2.5                               | 4.2                                      | 1.0                              | 1.8                                  | 4.8                                |
| <b>Mental Health Facilities</b>        | 2.3                               | 2.6                                      | 1.7                              | 2.0                                  | 3.3                                |
| <b>Medical Doctor - MD (NEC)</b>       | 1.7                               | 7.0                                      | 1.2                              | 1.6                                  | 1.8                                |
| <b>Multi-Specialty Physician Group</b> | 1.4                               | 3.5                                      | 1.8                              | 1.4                                  | 0.9                                |
| <b>Other Facility (NEC)</b>            | 1.3                               | 1.3                                      | 0.9                              | 1.0                                  | 2.1                                |

<sup>1</sup> As defined by IBM® MarketScan®

<sup>2</sup> Combines all provider types with less than 1% of patients

Mental health treatment utilization in the 12 months post MDD diagnosis by health insurance plan type

| Health Insurance Plan Type      | N      | No Treatment (%) | Rx Only (%) | Psychotherapy Only (%) | Rx + Psychotherapy (%) | Median (IQR) PDC <sup>1</sup> | Median (IQR) Psych Visits <sup>1</sup> |
|---------------------------------|--------|------------------|-------------|------------------------|------------------------|-------------------------------|----------------------------------------|
| All                             | 24,579 | 5.3              | 11.2        | 47.3                   | 36.2                   | 0.38 (0.16-0.74)              | 7 (3-16)                               |
| Consumer driven health plan     | 1,996  | 6.4              | 12.0        | 49.4                   | 32.2                   | 0.41 (0.16-0.77)              | 7 (3-17)                               |
| Comprehensive                   | 613    | 5.2              | 6.0         | 48.5                   | 40.3                   | 0.32 (0.10-0.70)              | 7 (3-16)                               |
| Exclusive provider organization | 299    | 6.4              | 11.4        | 47.5                   | 34.8                   | 0.42 (0.16-0.75)              | 8 (4-17)                               |
| High-deductible health plan     | 894    | 9.2              | 16.6        | 42.5                   | 31.8                   | 0.45 (0.16-0.81)              | 6 (3-15)                               |
| Health maintenance organization | 3,692  | 5.4              | 10.8        | 48.0                   | 35.8                   | 0.38 (0.16-0.73)              | 8 (3-18)                               |
| Point-of-service                | 3,000  | 4.6              | 8.2         | 48.3                   | 38.9                   | 0.33 (0.12-0.70)              | 8 (3-18)                               |
| Preferred provider organization | 13,946 | 5.0              | 11.6        | 47.0                   | 36.4                   | 0.38 (0.16-0.75)              | 7 (3-16)                               |
| Missing                         | 139    | 7.2              | 14.4        | 41.7                   | 36.7                   | 0.29 (0.11-0.72)              | 8 (3-17)                               |

<sup>1</sup> Statistics only include those initiating treatment within the 12 months post MDD diagnosis

The percent of individuals by antidepressant type whose first antidepressant prescription was below or above the American Psychiatric Association's starting dosage recommendation.

| <b>Antidepressant Type (Class)</b> | <b>N</b> | <b>% Under</b> | <b>% Over</b> | <b>% Outside</b> |
|------------------------------------|----------|----------------|---------------|------------------|
| Escitalopram (SSRI)                | 2,459    | 5.2            | 15.2          | 20.4             |
| Sertraline (SSRI)                  | 2,425    | 16.9           | 13.4          | 30.3             |
| Citalopram (SSRI)                  | 2,341    | 20.8           | 7.9           | 28.8             |
| Bupropion (NDRA)                   | 1,823    | 14.6           | 10.7          | 25.3             |
| Fluoxetine (SSRI)                  | 1,191    | 30.8           | 3.8           | 34.6             |
| Trazodone (SM)                     | 685      | 96.8           | 0.3           | 97.1             |
| Duloxetine HCl (SNRI)              | 589      | 53.5           | 0             | 53.5             |
| Paroxetine (SSRI)                  | 491      | 0.8            | 54.6          | 55.4             |
| Venlafaxine HCl (SNRI)             | 414      | 43.5           | 1.9           | 45.4             |
| Amitriptyline & Comb. (TCA)        | 266      | 2.3            | 26.3          | 28.6             |
| Mirtazapine (SM)                   | 197      | 60.9           | 6.1           | 67.0             |
| Nortriptyline (TCA)                | 195      | 0              | 9.7           | 9.7              |
| Desvenlafaxine (SNRI)              | 2,459    | 5.2            | 15.2          | 20.4             |

The percent of individuals by depression severity whose first antidepressant prescription was either below or above the American Psychiatric Association's starting dosage recommendation. Results only shown for groups with at least 100 patients.

| Antidepressant Type<br>(Class) | Mild depression |         |        |              | Moderate depression |         |        |              | Severe depression |         |        |              |
|--------------------------------|-----------------|---------|--------|--------------|---------------------|---------|--------|--------------|-------------------|---------|--------|--------------|
|                                | N               | % Under | % Over | %<br>Outside | N                   | % Under | % Over | %<br>Outside | N                 | % Under | % Over | %<br>Outside |
| Citalopram (SSRI)              | 430             | 26.3    | 6.7    | 33.0         | 1,198               | 20.9    | 7.3    | 28.1         | 672               | 17.4    | 9.2    | 26.6         |
| Sertraline (SSRI)              | 468             | 19.7    | 12.2   | 31.8         | 1,190               | 16.0    | 10.7   | 26.6         | 724               | 16.7    | 17.4   | 34.1         |
| Escitalopram (SSRI)            | 479             | 6.5     | 13.4   | 19.8         | 1,159               | 4.8     | 15.4   | 20.2         | 790               | 4.7     | 16.5   | 21.1         |
| Bupropion (NDRA)               | 401             | 13.2    | 11.0   | 24.2         | 916                 | 14.4    | 8.7    | 23.1         | 468               | 15.6    | 14.1   | 29.7         |
| Fluoxetine (SSRI)              | 252             | 34.5    | 4.4    | 38.9         | 598                 | 31.8    | 3.2    | 34.9         | 308               | 26.9    | 3.6    | 30.5         |
| Trazodone (SM)                 | 130             | 96.2    | 0      | 96.2         | 318                 | 96.5    | 0      | 96.5         | 223               | 97.3    | 0.9    | 98.2         |
| Duloxetine HCl (SNRI)          | -               | -       | -      | -            | 285                 | 50.9    | 0      | 50.9         | 207               | 54.1    | 0      | 54.1         |
| Venlafaxine HCl (SNRI)         | -               | -       | -      | -            | 259                 | 1.2     | 48.6   | 49.8         | 136               | 0       | 67.6   | 67.6         |
| Paroxetine (SSRI)              | 117             | 37.6    | 12.0   | 49.6         | 256                 | 31.6    | 7.8    | 39.5         | 171               | 34.5    | 11.1   | 45.6         |
| Amitriptyline & Comb.<br>(TCA) | -               | -       | -      | -            | 203                 | 46.3    | 2.0    | 48.3         | 120               | 37.5    | 0      | 37.5         |
| Mirtazapine (SM)               | -               | -       | -      | -            | 120                 | 3.3     | 24.2   | 27.5         | 121               | 1.7     | 27.3   | 28.9         |
| Nortriptyline (TCA)            | -               | -       | -      | -            | 113                 | 62.8    | 8.8    | 71.7         | -                 | -       | -      | -            |

Antidepressant adherence in the acute and continuation phase by MDD severity and number of antidepressants filled during the treatment phase

| Depression Diagnosis | Adherence in the acute phase |      |                                    |      |                                        |      | Adherence in the continuation phase |      |                                    |      |                                        |      |
|----------------------|------------------------------|------|------------------------------------|------|----------------------------------------|------|-------------------------------------|------|------------------------------------|------|----------------------------------------|------|
|                      | All                          |      | Single antidepressant class filled |      | Multiple antidepressant classes filled |      | All                                 |      | Single antidepressant class filled |      | Multiple antidepressant classes filled |      |
|                      | N                            | %    | N                                  | %    | N                                      | %    | N                                   | %    | N                                  | %    | N                                      | %    |
| <b>Remission</b>     | 213                          | 49.3 | 178                                | 47.2 | 35                                     | 60.0 | 213                                 | 39.4 | 167                                | 37.1 | 46                                     | 47.8 |
| <b>Mild</b>          | 2,454                        | 42.1 | 2,103                              | 40.2 | 351                                    | 53.6 | 2,454                               | 31.6 | 1,996                              | 29.4 | 458                                    | 41.5 |
| <b>Moderate</b>      | 6,629                        | 44.1 | 5,356                              | 41.2 | 1,273                                  | 56.6 | 6,629                               | 34.6 | 4,994                              | 32.0 | 1,635                                  | 42.4 |
| <b>Severe</b>        | 4,228                        | 37.4 | 3,198                              | 33.8 | 1,030                                  | 48.5 | 4,228                               | 28.0 | 2,963                              | 25.0 | 1,265                                  | 34.9 |
| <b>All</b>           | 13,524                       | 41.7 | 10,835                             | 38.9 | 2,689                                  | 53.1 | 13,524                              | 32.0 | 10,120                             | 29.5 | 3,404                                  | 39.6 |

Results from the logistic regression model assessing the determinants of psychotherapy utilization (n = 21,035). Variables were selected using the lasso procedure.

| Variable                                                                                          | Odds ratio | 95% confidence interval | p-value |
|---------------------------------------------------------------------------------------------------|------------|-------------------------|---------|
| <b>Time to first psychotherapy visit from initial depression diagnosis. ≤30 days as reference</b> |            |                         |         |
| 30 to ≤365 days                                                                                   | 0.59       | 0.49-0.70               | <0.0001 |
| >365 days                                                                                         | 0.62       | 0.49-0.78               | <0.0001 |
| <b>Initial depression severity. Moderate as reference</b>                                         |            |                         |         |
| Remission                                                                                         | 0.77       | 0.57-1.04               | 0.084   |
| Mild                                                                                              | 0.89       | 0.82-0.96               | 0.004   |
| Severe                                                                                            | 1.29       | 1.20-1.38               | <0.0001 |
| <b>First depression diagnosed in an inpatient setting (0 = no, 1= yes)</b>                        | 1.24       | 1.09-1.42               | 0.001   |
| <b>Percent of psychotherapy costs covered by patient <sup>1</sup></b>                             | 0.90       | 0.81-1.00               | 0.041   |
| <b>Prior antidepressant fill (0 = no, 1 = yes)</b>                                                | 1.32       | 1.24-1.40               | <0.0001 |
| <b>Salaried employee (0 = no, 1 = yes) <sup>2</sup></b>                                           | 1.19       | 1.11-1.27               | <0.0001 |
| <b>Patient in a union (0 = no, 1 = yes) <sup>2</sup></b>                                          | 1.33       | 1.24-1.44               | <0.0001 |
| <b>Comorbidities (0 = not present, 1 = present) <sup>3</sup></b>                                  |            |                         |         |
| Adjustment disorders                                                                              | 1.40       | 1.28-1.52               | <0.0001 |
| Anxiety disorders                                                                                 | 1.40       | 1.29-1.53               | <0.0001 |
| Arrhythmia                                                                                        | 0.75       | 0.62-0.91               | 0.003   |
| Attention deficit disorder and attention deficit hyperactivity disorder                           | 0.73       | 0.57-0.93               | 0.011   |
| Fluid and electrolyte disorder                                                                    | 0.74       | 0.57-0.95               | 0.02    |
| Obesity                                                                                           | 0.75       | 0.65-0.86               | <0.0001 |
| Rheumatoid arthritis/ collagen vascular disease                                                   | 0.77       | 0.62-0.97               | 0.025   |
| Solid tumor with metastasis diagnosis                                                             | 0.75       | 0.60-0.95               | 0.017   |
| <b>Work industry (0 = not in industry, 1 = in industry) <sup>2</sup></b>                          |            |                         |         |
| Manufacturing non-durable goods                                                                   | 0.86       | 0.76-0.96               | 0.007   |



| <b>Variable</b>                                                                                     | <b>Odds ratio</b> | <b>95% confidence interval</b> | <b>p-value</b> |
|-----------------------------------------------------------------------------------------------------|-------------------|--------------------------------|----------------|
| <b>Retail and trade</b>                                                                             | 0.85              | 0.71-1.01                      | 0.062          |
| <b>Finance, insurance, and real estate</b>                                                          | 1.12              | 1.04-1.20                      | 0.004          |
| <b>Patient covered by point of service health plan (0 = no, 1 = yes) <sup>2</sup></b>               | 1.08              | 0.98-1.18                      | 0.108          |
| <b>Setting of initial depression diagnosis (0= not at setting, 1= at setting)</b>                   |                   |                                |                |
| <b>Acute care hospital</b>                                                                          | 1.29              | 1.04-1.60                      | 0.023          |
| <b>Family practice</b>                                                                              | 0.97              | 0.82-1.15                      | 0.706          |
| <b>Other facility not elsewhere specified</b>                                                       | 0.73              | 0.54-0.98                      | 0.034          |
| <b>Psychiatry</b>                                                                                   | 0.61              | 0.54-0.68                      | <0.0001        |
| <b>Psychologist</b>                                                                                 | 1.41              | 1.26-1.58                      | <0.0001        |
| <b>Supportive therapist</b>                                                                         | 1.22              | 1.10-1.36                      | <0.0001        |
| <sup>1</sup> In the 28 days after the first psychotherapy visit                                     |                   |                                |                |
| <sup>2</sup> At the time of the first depression diagnosis                                          |                   |                                |                |
| <sup>3</sup> Noted in the medical claim records in the year prior to the first depression diagnosis |                   |                                |                |
